# Supplementary material
Source: publisher figshare collection journal article supplement (https://wiley.figshare.com/ndownloader/files/13314668)
Supplement: Supplementary file 1 [file 13314668]

CaMKK  $\beta$

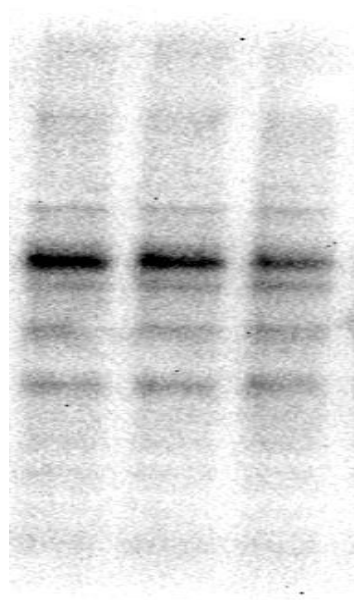

$\beta$ -actin

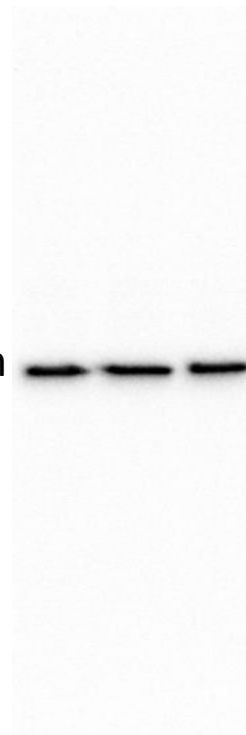

Ctrl  
Scrambled siRNA  
CaMKK  $\beta$  siRNA

Ctrl  
Scrambled siRNA  
CaMKK  $\beta$  siRNA

SIRT1

Norm DMSO  
Norm STO-609  
OGD18h DMSO  
OGD18h STO-609

Actin

Norm DMSO  
Norm STO-609  
OGD18h DMSO  
OGD18h STO-609

P-SIRT1

Norm DMSO  
Norm STO-609  
OGD18h DMSO  
OGD18h STO-609

Actin

Norm DMSO  
Norm STO-609  
OGD18h DMSO  
OGD18h STO-609

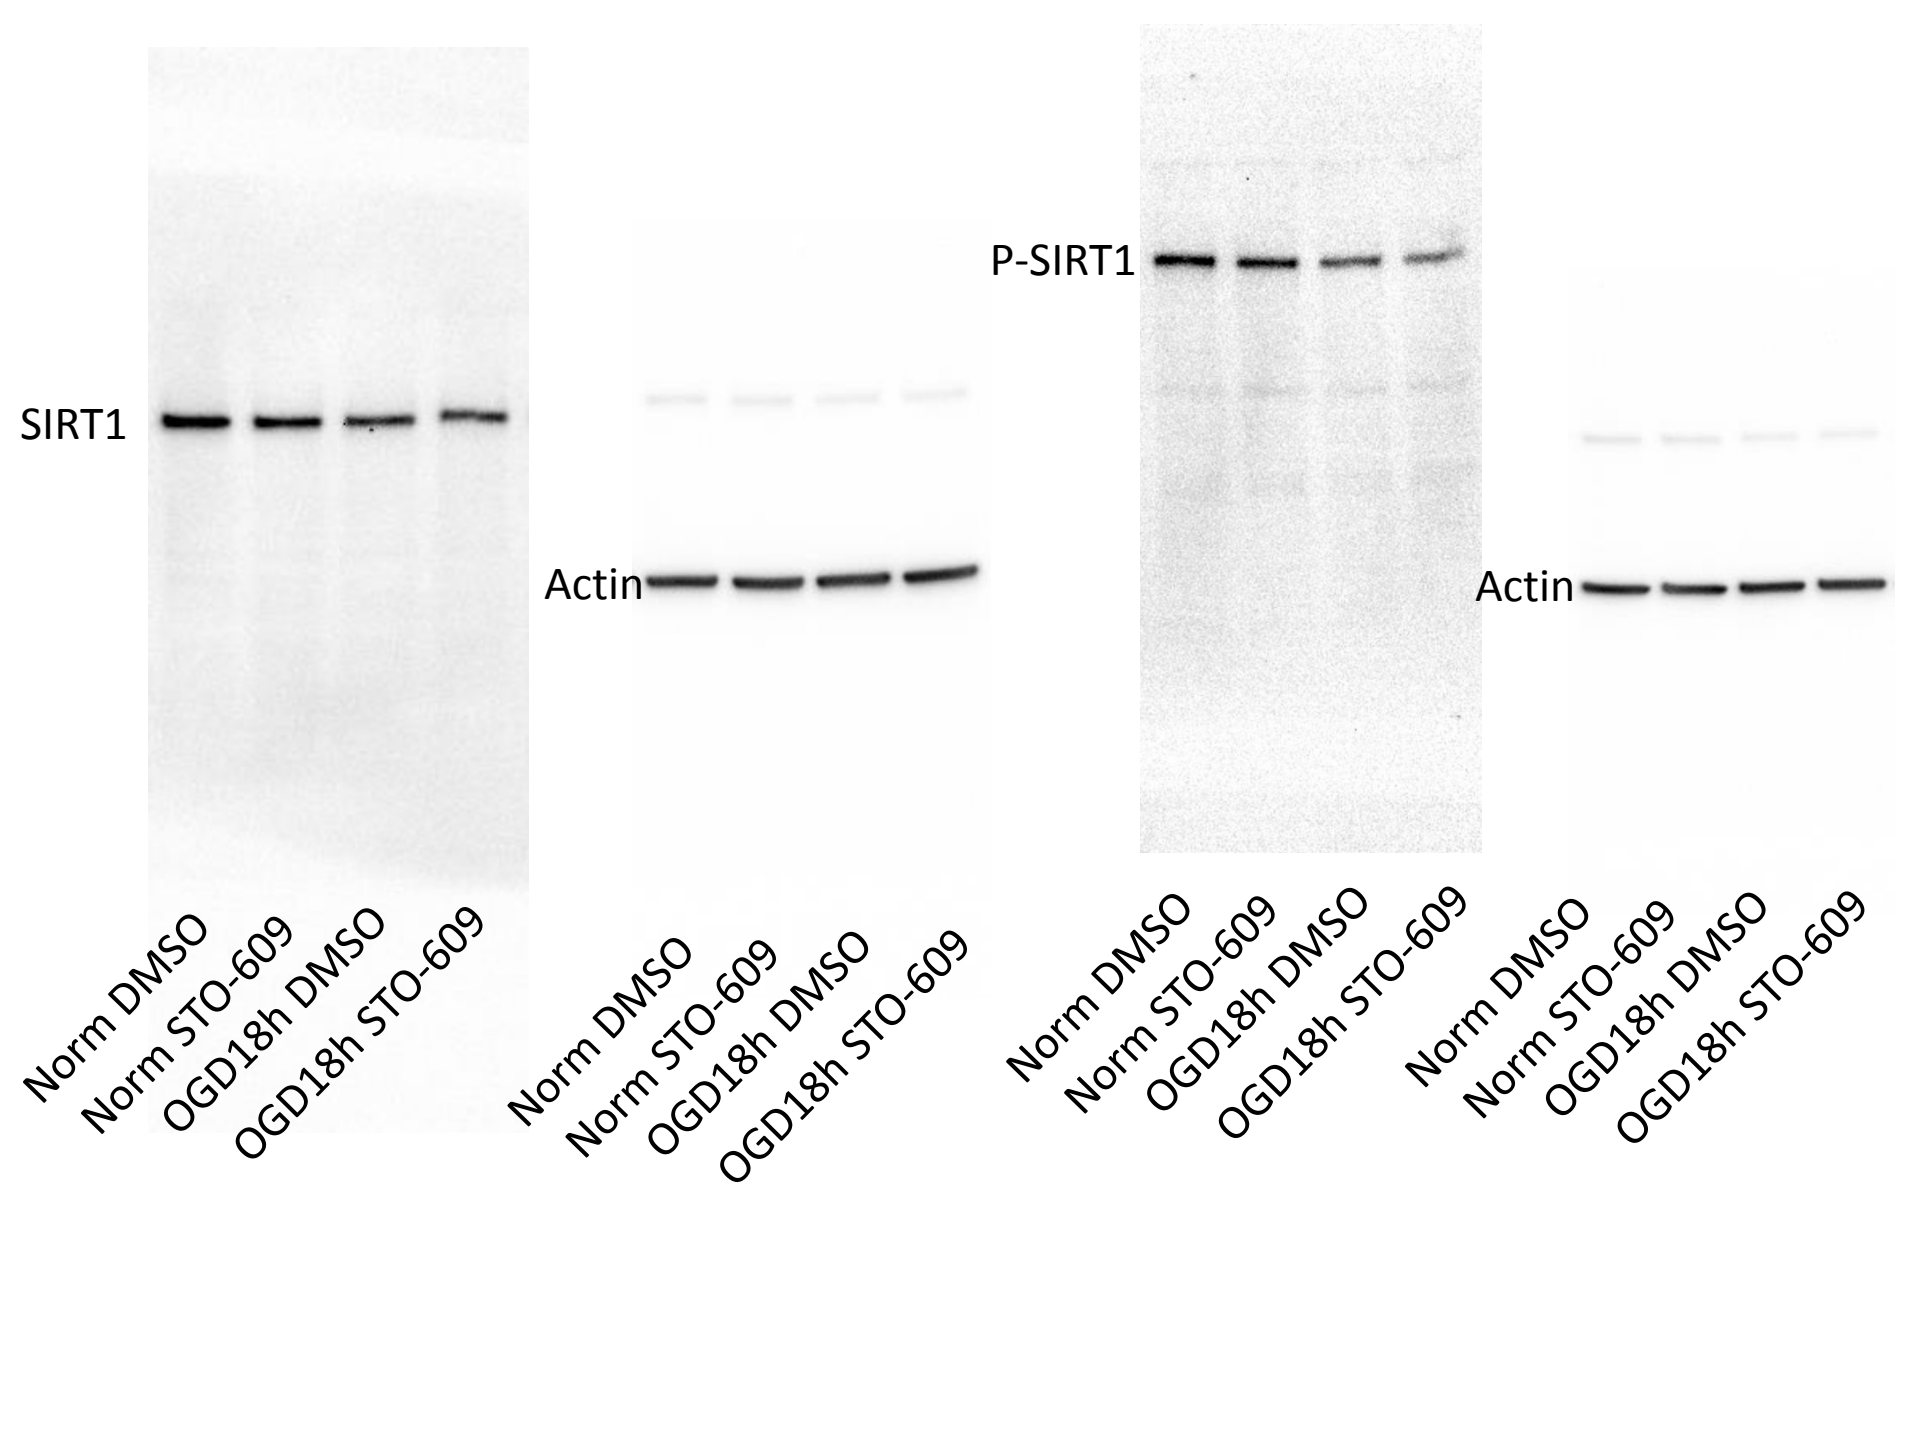

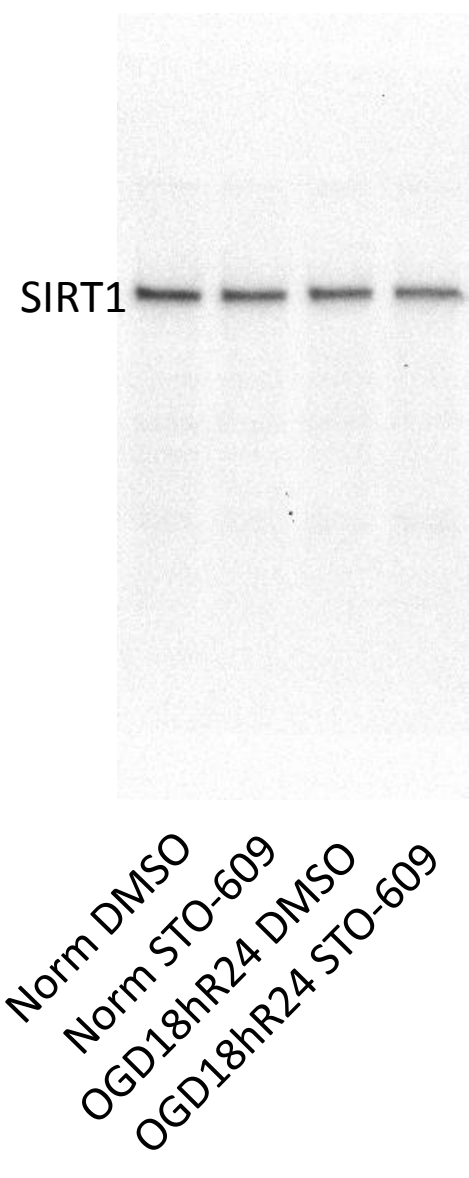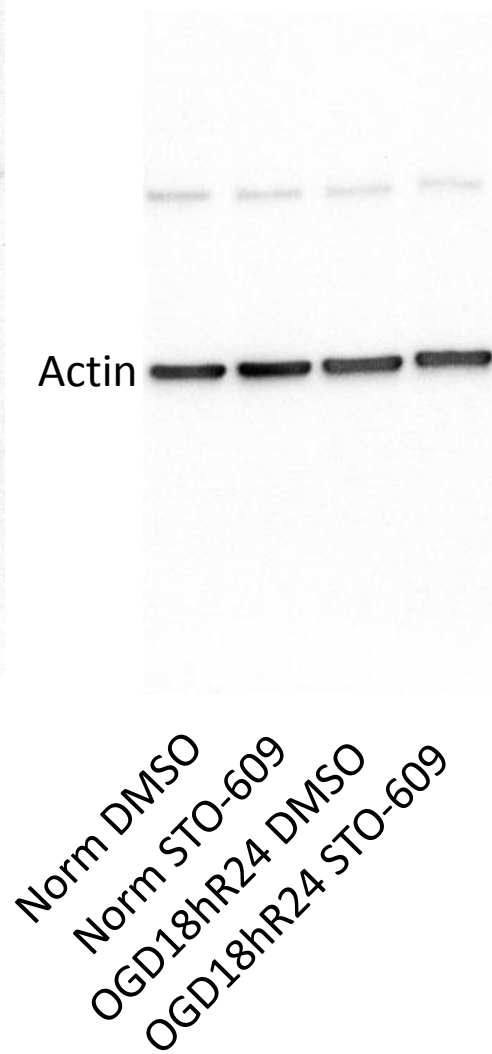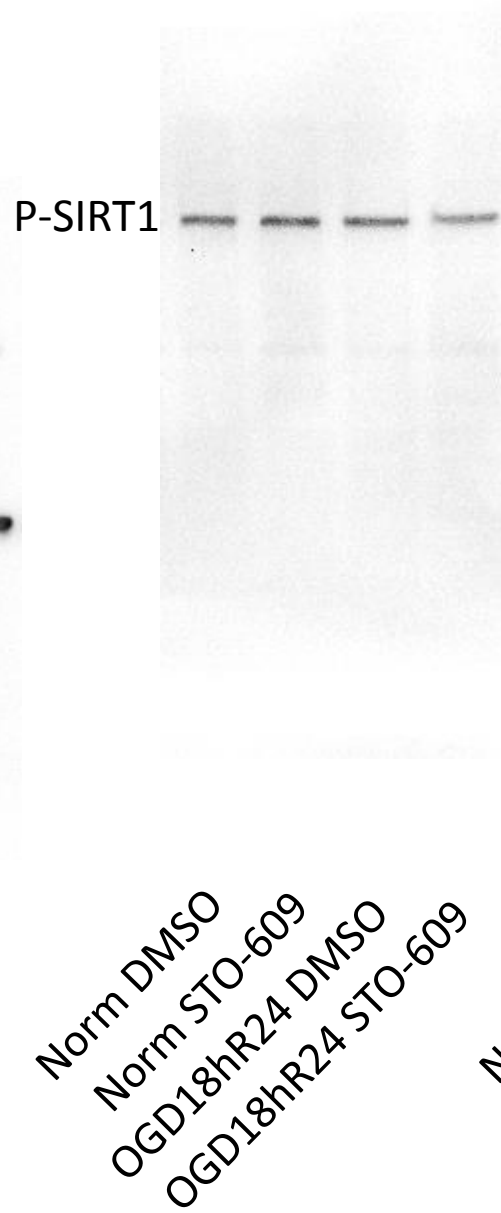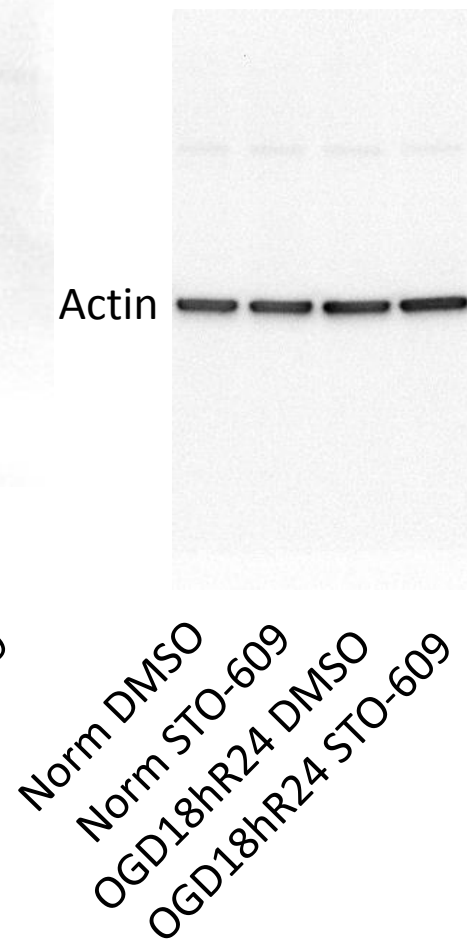

P-CaMKIV

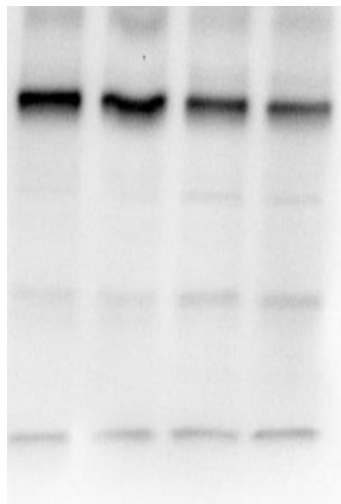

eNOS

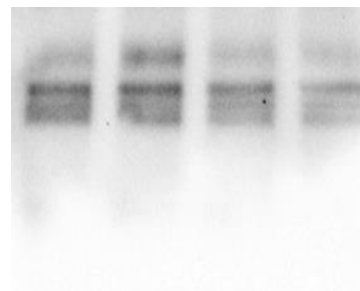

Actin

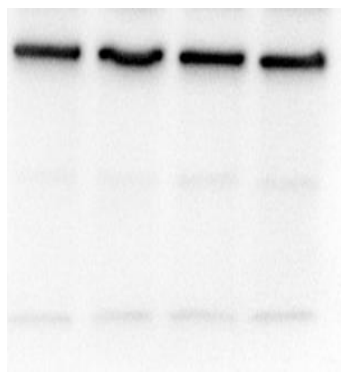

$\beta$ -actin

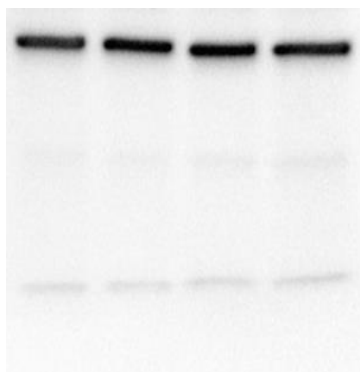

Norm DMSO  
Norm STO-609  
OGD18hR24 DMSO  
OGD18hR24 STO-609

Norm DMSO  
Norm STO-609  
OGD18hR24 DMSO  
OGD18hR24 STO-609

VCAM-1

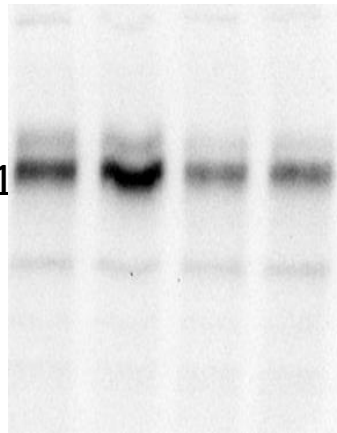

ICAM-1

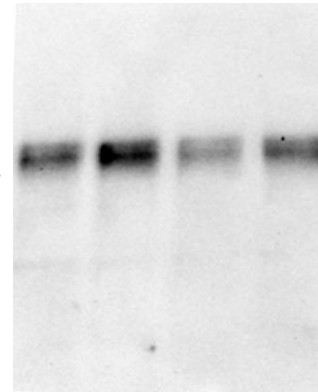

$\beta$ -actin

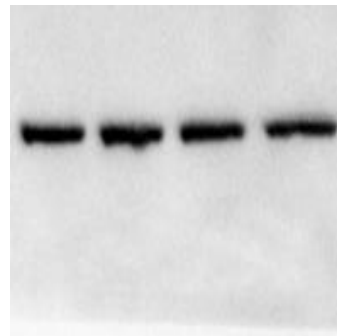

$\beta$ -actin

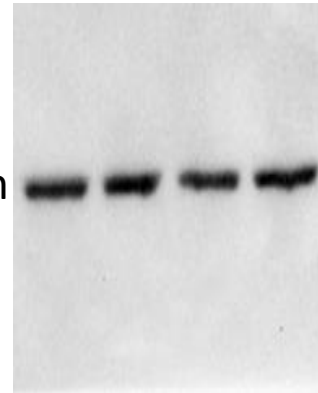

Norm DMSO  
Norm STO-609  
OGD18hR24 DMSO  
OGD18hR24 STO-609

Norm DMSO  
Norm STO-609  
OGD18hR24 DMSO  
OGD18hR24 STO-609
